# Supplementary material for: Immunoprecipitation-targeted proteomics assays facilitate rational development of SARS-CoV-2 serological diagnostics
Source: medRxiv preprint, doi:10.1101/2021.10.25.21265408, version 1 (2021-10-26)
Supplement: Supplemental Figures and Information [file 265408_file02.DOCX]

**Supplemental Figures and Information for**

**Immunoprecipitation-targeted proteomics assays facilitate rational development of SARS-CoV-2 serological diagnostics**

Zhiqiang Fu1*, Yasmine Rais1* and Andrei P. Drabovich1**

1 Division of Analytical and Environmental Toxicology, Department of Laboratory Medicine and Pathology, Faculty of Medicine and Dentistry, University of Alberta, Edmonton, Alberta, Canada T6G 2G3

*Contributed equally

**Supplemental Figure S1**


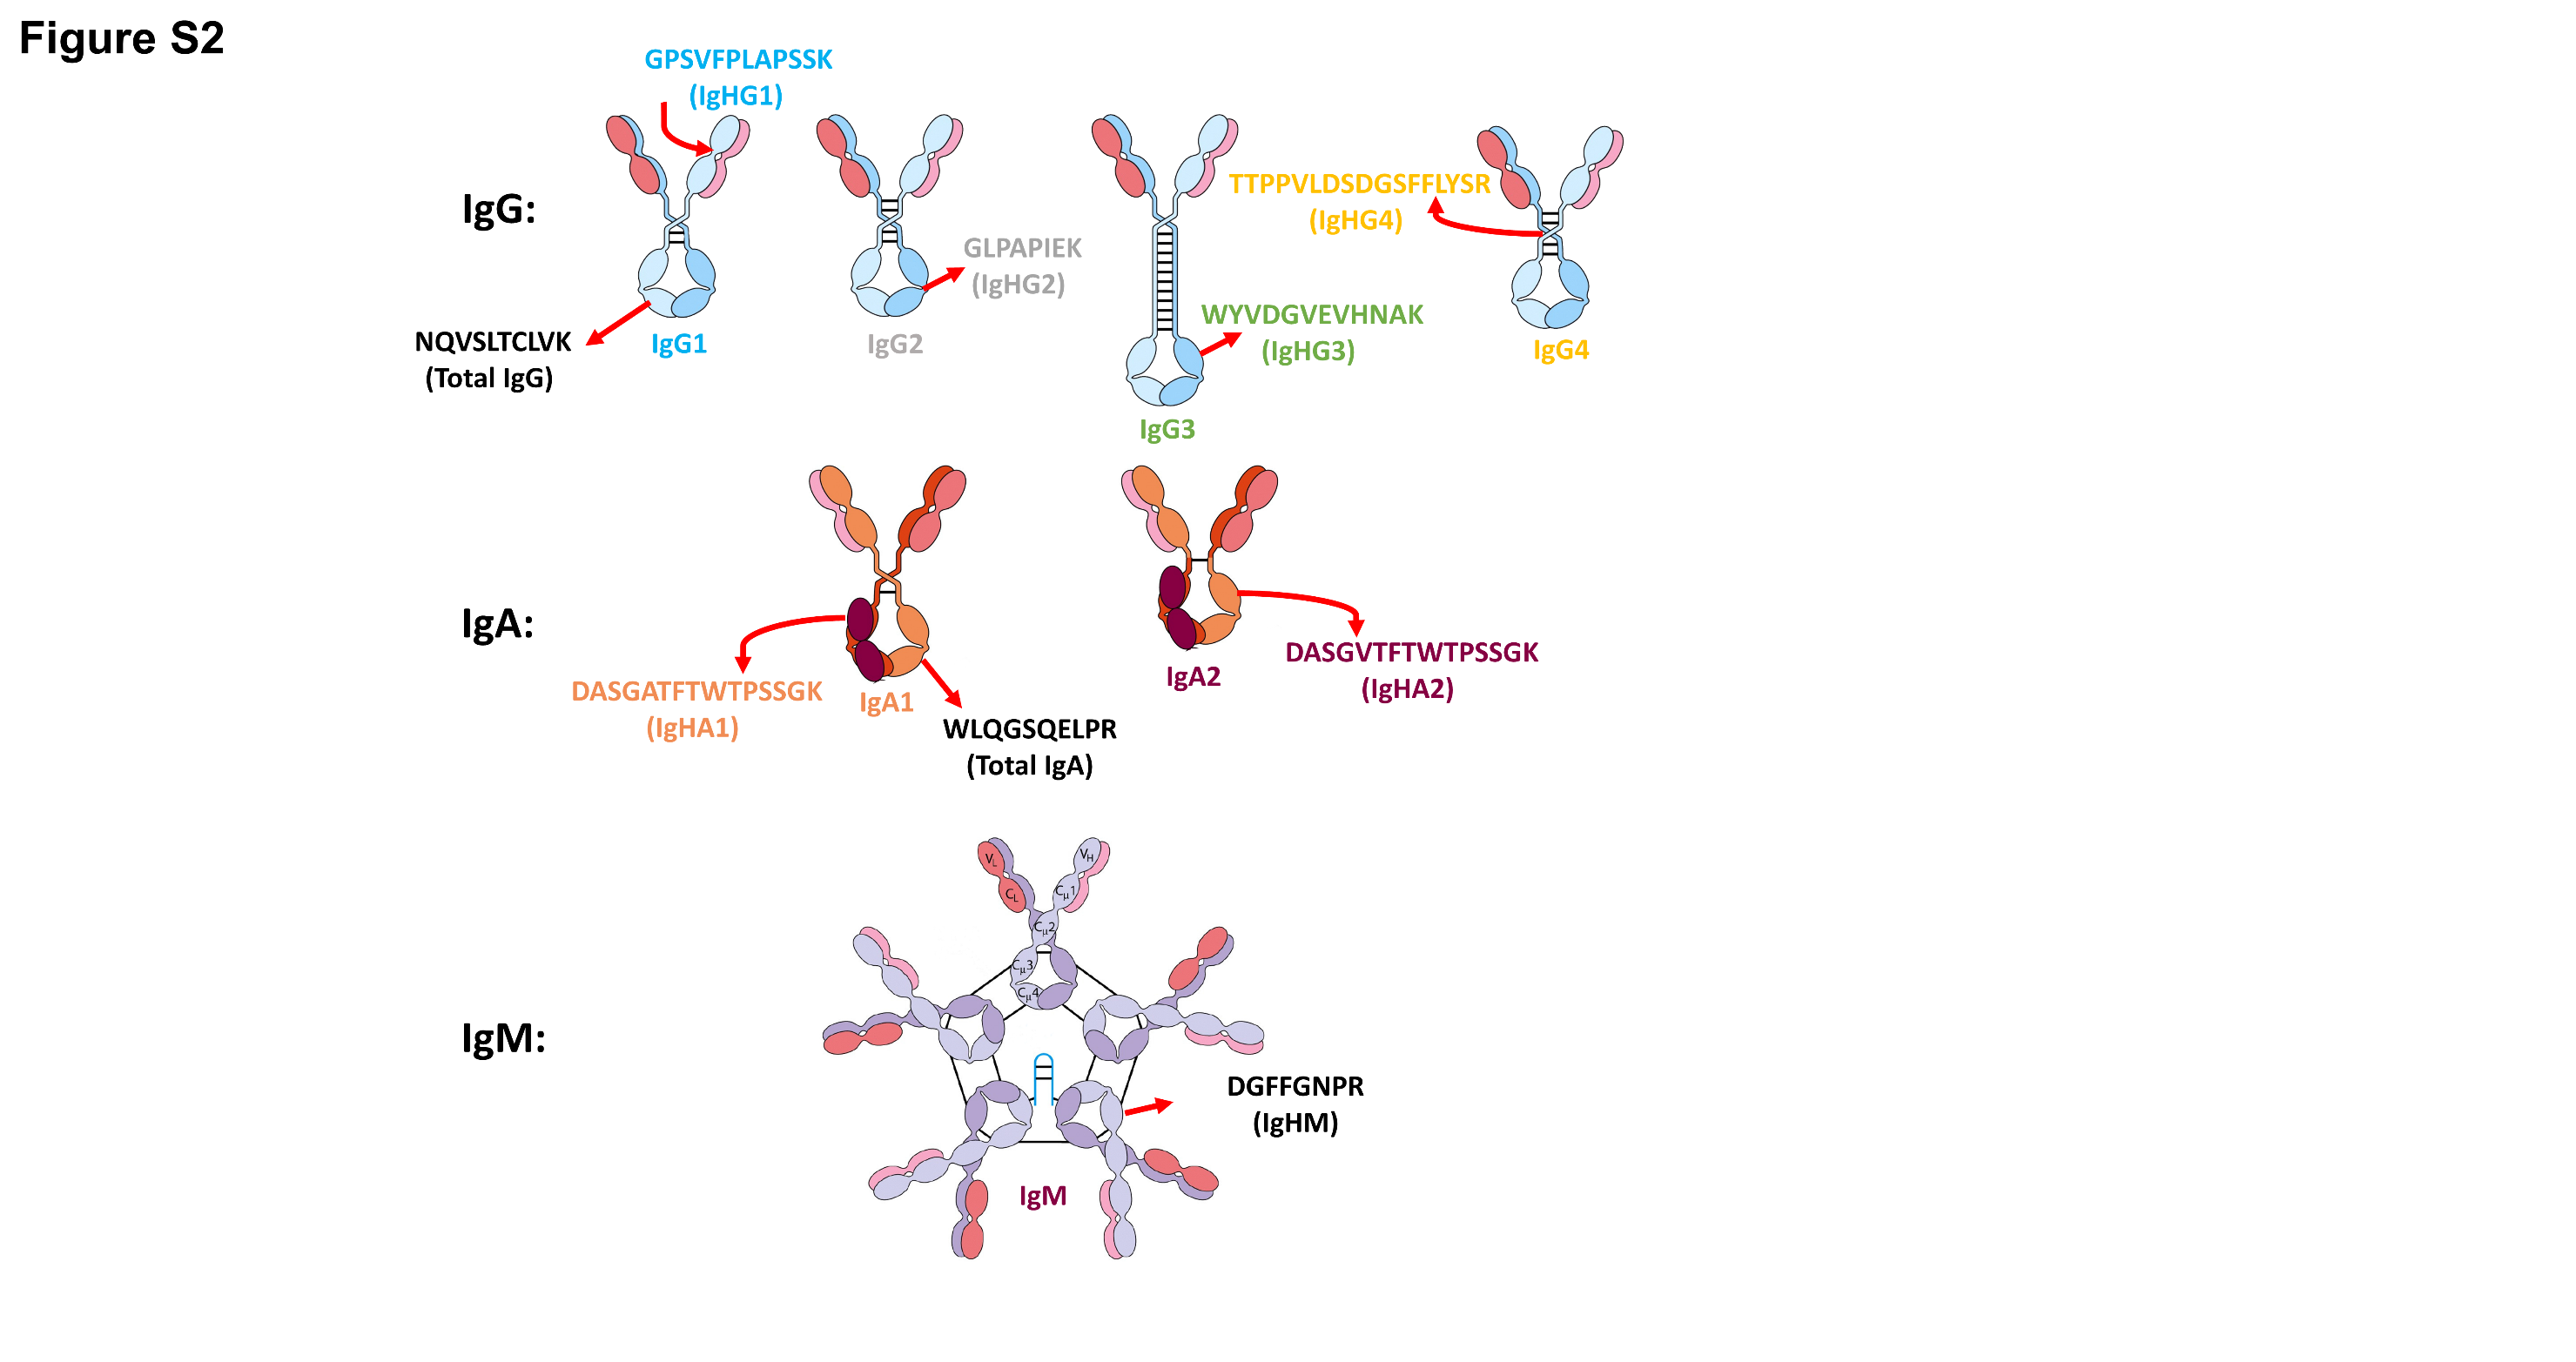


**Figure S1. Immunoglobulin constant regions targeted by proteotypic peptides and used for quantification of immunoglobulin isotypes and subclasses.**

**Supplemental Figure S2**


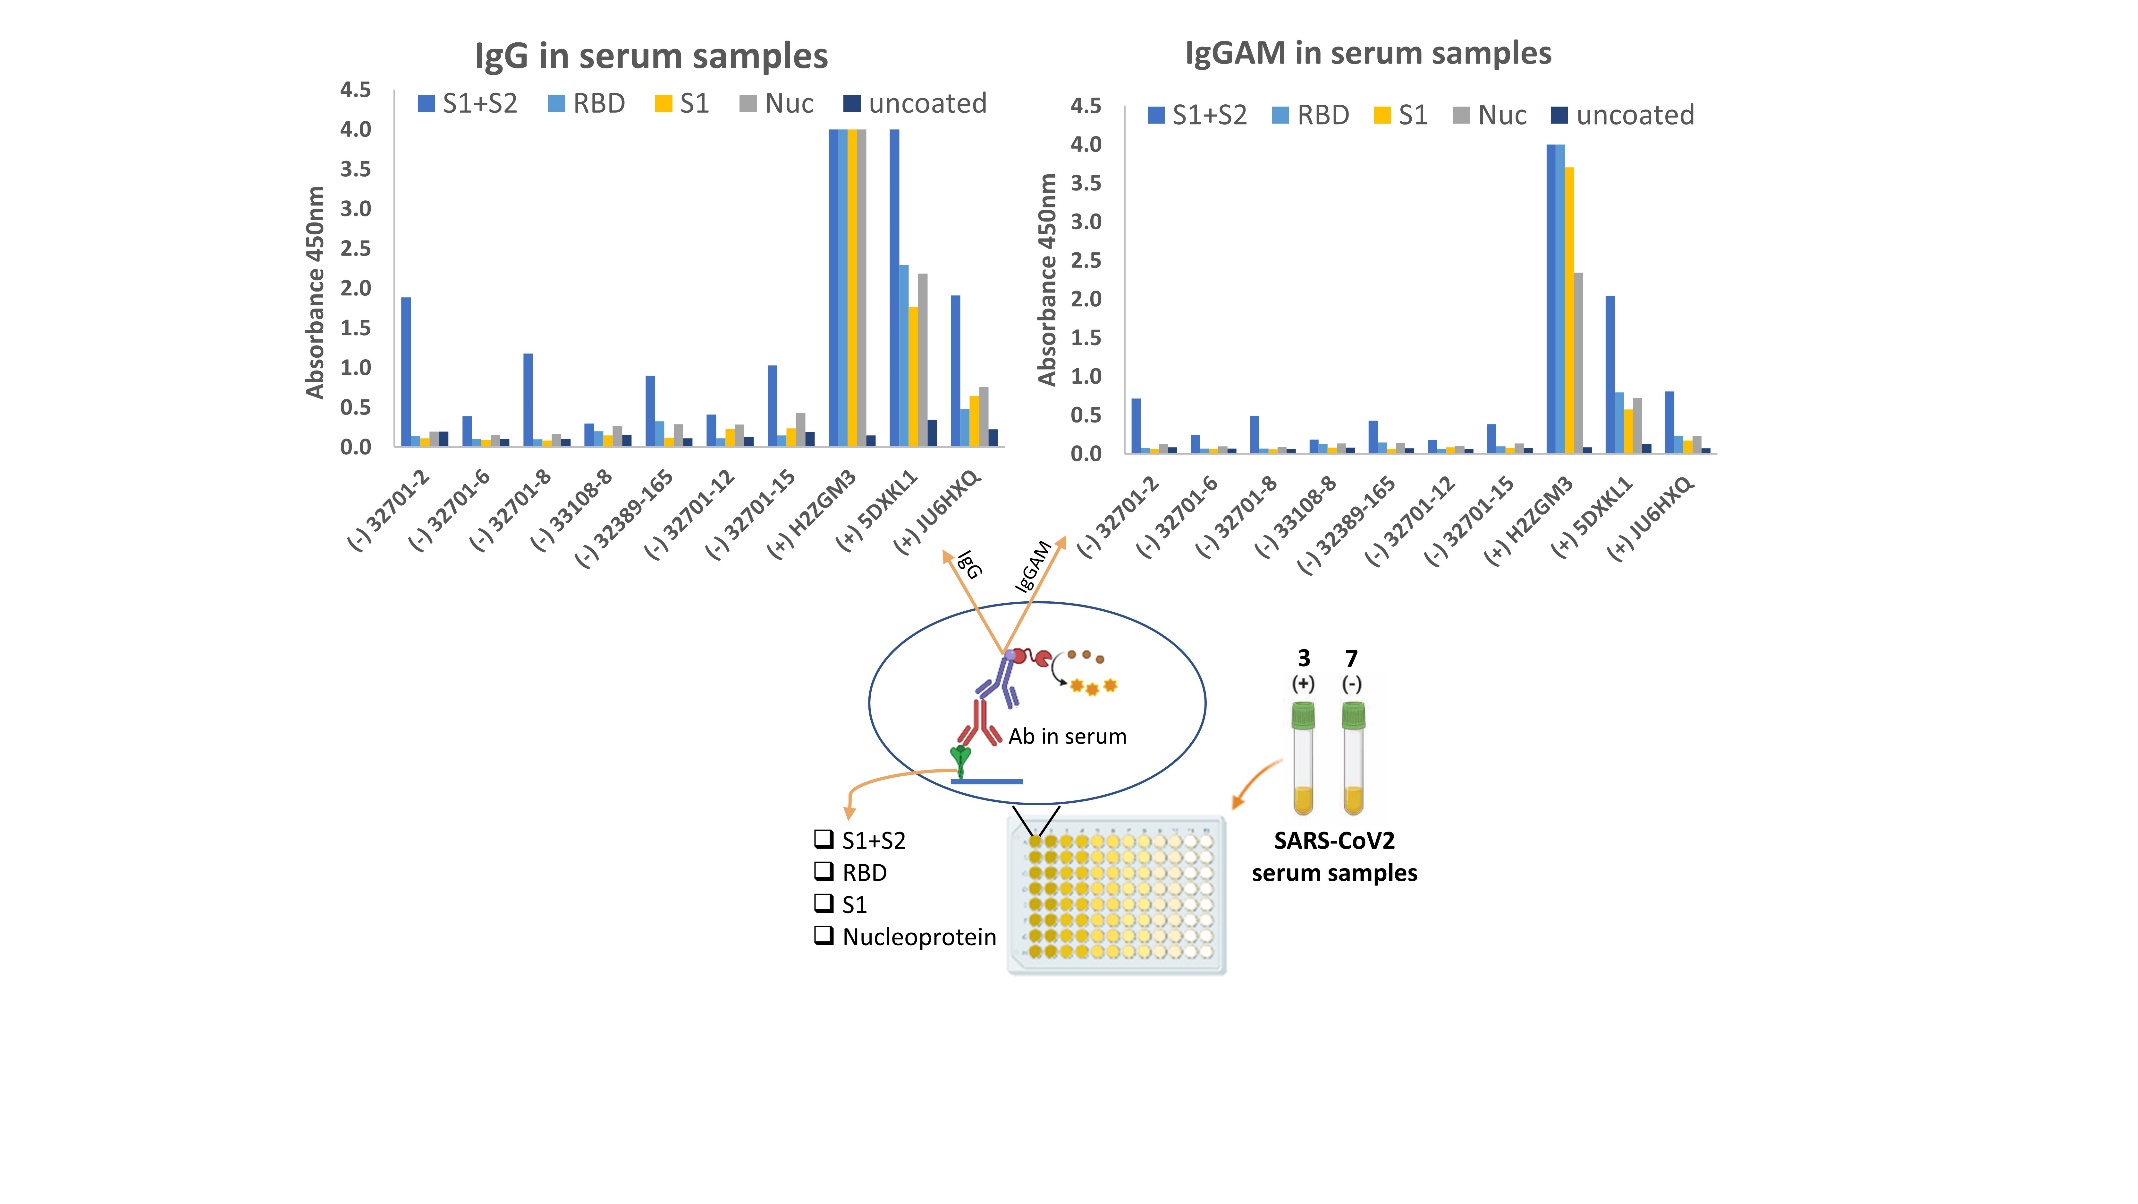


**Figure S2.** **Development of indirect ELISA for quantification of IgG and IgGAM antibodies in serum samples.** Ten serum samples (3 positive and 7 negative) were tested for COVID-19 specific antibodies. Each serum sample was tested against four different antigens (S1+S2 ECD, RBD, S1, and Nucleoprotein). As a control, serum samples were measured in wells incubated with PBS buffer instead of antigens.

**Supplemental Information.** The list of Standards for Reporting of Diagnostic Accuracy Studies (STARD2015) recommendations followed in the present work.

|  | **Section & Topic** | **No** | **Item** | **Reported on page #** |
| --- | --- | --- | --- | --- |
|  |  |  |  |  |
|  | **TITLE OR ABSTRACT** |  |  |  |
|  |  | **1** | Identification as a study of diagnostic accuracy using at least one measure of accuracy  (such as sensitivity, specificity, predictive values, or AUC) | N/A |
|  | **ABSTRACT** |  |  |  |
|  |  | **2** | Structured summary of study design, methods, results, and conclusions  (for specific guidance, see STARD for Abstracts) | N/A |
|  | **INTRODUCTION** |  |  |  |
|  |  | **3** | Scientific and clinical background, including the intended use and clinical role of the index test | 2 |
|  |  | **4** | Study objectives and hypotheses | 1-2 |
|  | **METHODS** |  |  |  |
|  | *Study design* | **5** | Whether data collection was planned before the index test and reference standard  were performed (prospective study) or after (retrospective study) | 12 |
|  | *Participants* | **6** | Eligibility criteria | 12 |
|  |  | **7** | On what basis potentially eligible participants were identified  (such as symptoms, results from previous tests, inclusion in registry) | N/A |
|  |  | **8** | Where and when potentially eligible participants were identified (setting, location and dates) | N/A |
|  |  | **9** | Whether participants formed a consecutive, random or convenience series | 12 |
|  | *Test methods* | **10a** | Index test, in sufficient detail to allow replication | 12-14 |
|  |  | **10b** | Reference standard, in sufficient detail to allow replication | 12-14 |
|  |  | **11** | Rationale for choosing the reference standard (if alternatives exist) | 12-14 |
|  |  | **12a** | Definition of and rationale for test positivity cut-offs or result categories  of the index test, distinguishing pre-specified from exploratory | 12-14 |
|  |  | **12b** | Definition of and rationale for test positivity cut-offs or result categories  of the reference standard, distinguishing pre-specified from exploratory | 12-14 |
|  |  | **13a** | Whether clinical information and reference standard results were available  to the performers/readers of the index test | 12-14 |
|  |  | **13b** | Whether clinical information and index test results were available  to the assessors of the reference standard | 12-14 |
|  | *Analysis* | **14** | Methods for estimating or comparing measures of diagnostic accuracy | 12-14 |
|  |  | **15** | How indeterminate index test or reference standard results were handled | 12-14 |
|  |  | **16** | How missing data on the index test and reference standard were handled | 12-14 |
|  |  | **17** | Any analyses of variability in diagnostic accuracy, distinguishing pre-specified from exploratory | 12-14 |
|  |  | **18** | Intended sample size and how it was determined | 12-14 |
|  | **RESULTS** |  |  |  |
|  | *Participants* | **19** | Flow of participants, using a diagram | N/A |
|  |  | **20** | Baseline demographic and clinical characteristics of participants | N/A |
|  |  | **21a** | Distribution of severity of disease in those with the target condition | N/A |
|  |  | **21b** | Distribution of alternative diagnoses in those without the target condition | N/A |
|  |  | **22** | Time interval and any clinical interventions between index test and reference standard | N/A |
|  | *Test results* | **23** | Cross tabulation of the index test results (or their distribution)  by the results of the reference standard | 8-9 |
|  |  | **24** | Estimates of diagnostic accuracy and their precision (such as 95% confidence intervals) | 8-9 |
|  |  | **25** | Any adverse events from performing the index test or the reference standard | N/A |
|  | **DISCUSSION** |  |  |  |
|  |  | **26** | Study limitations, including sources of potential bias, statistical uncertainty, and generalisability | 9-11 |
|  |  | **27** | Implications for practice, including the intended use and clinical role of the index test | 9-11 |
|  | **OTHER INFORMATION** |  |  |  |
|  |  | **28** | Registration number and name of registry | N/A |
|  |  | **29** | Where the full study protocol can be accessed | N/A |
|  |  | **30** | Sources of funding and other support; role of funders | 20 |
|  |  |  |  |  |
